# Supplementary material
Source: Springer Nature journal article supplement (https://www.springermedizin.de/resource/supplementary/13099_2014_152_MOESM7_ESM.pdf/9665668)

*Lactococcus lactis* NCDO2118

Intestinal Epithelial Cells

M Cell

↑IL-6  
= IL-10

↑ Tolerogenic Dendritic Cell

CD11c<sup>+</sup>CD11b<sup>-</sup>CD103<sup>+</sup>

Naïve T Cell

Treg Cell

CD4<sup>+</sup>CD25<sup>+</sup>LAP<sup>+</sup>

Effector T Cells

Regulatory T Cells

Mesenteric Lymph Node

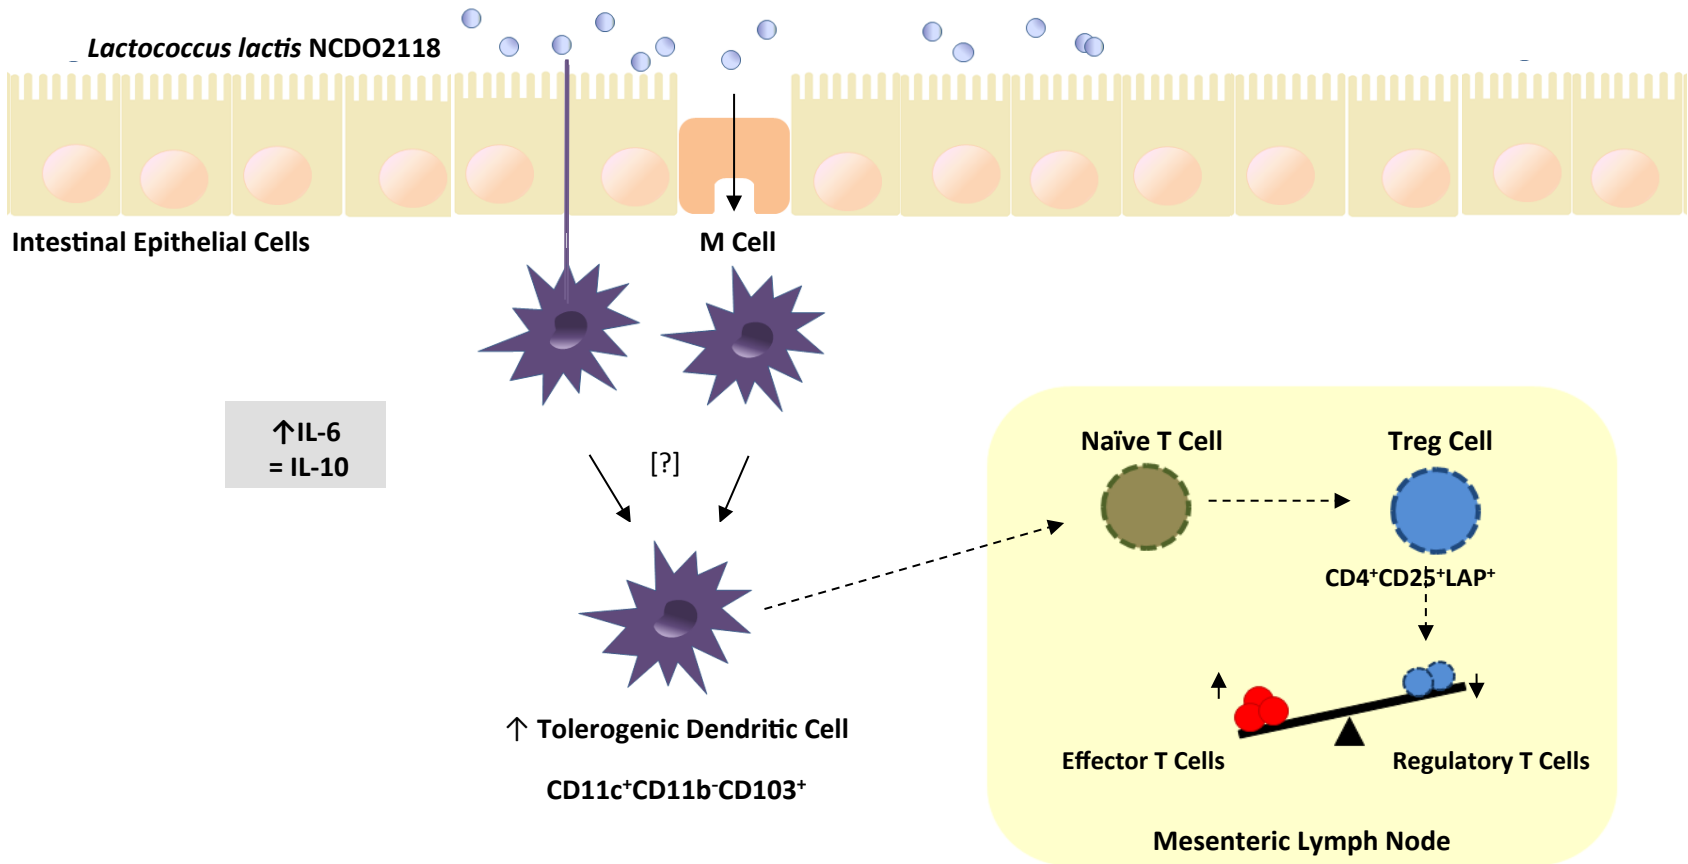

Supplement: MOESM7 [file 9665668]
